# Supplementary material for: Past the first date: Resolving successive lead-loss episodes in zircon
Source: Copernicus journal article supplement (doi:10.5194/egusphere-2026-280), 2026-02-12

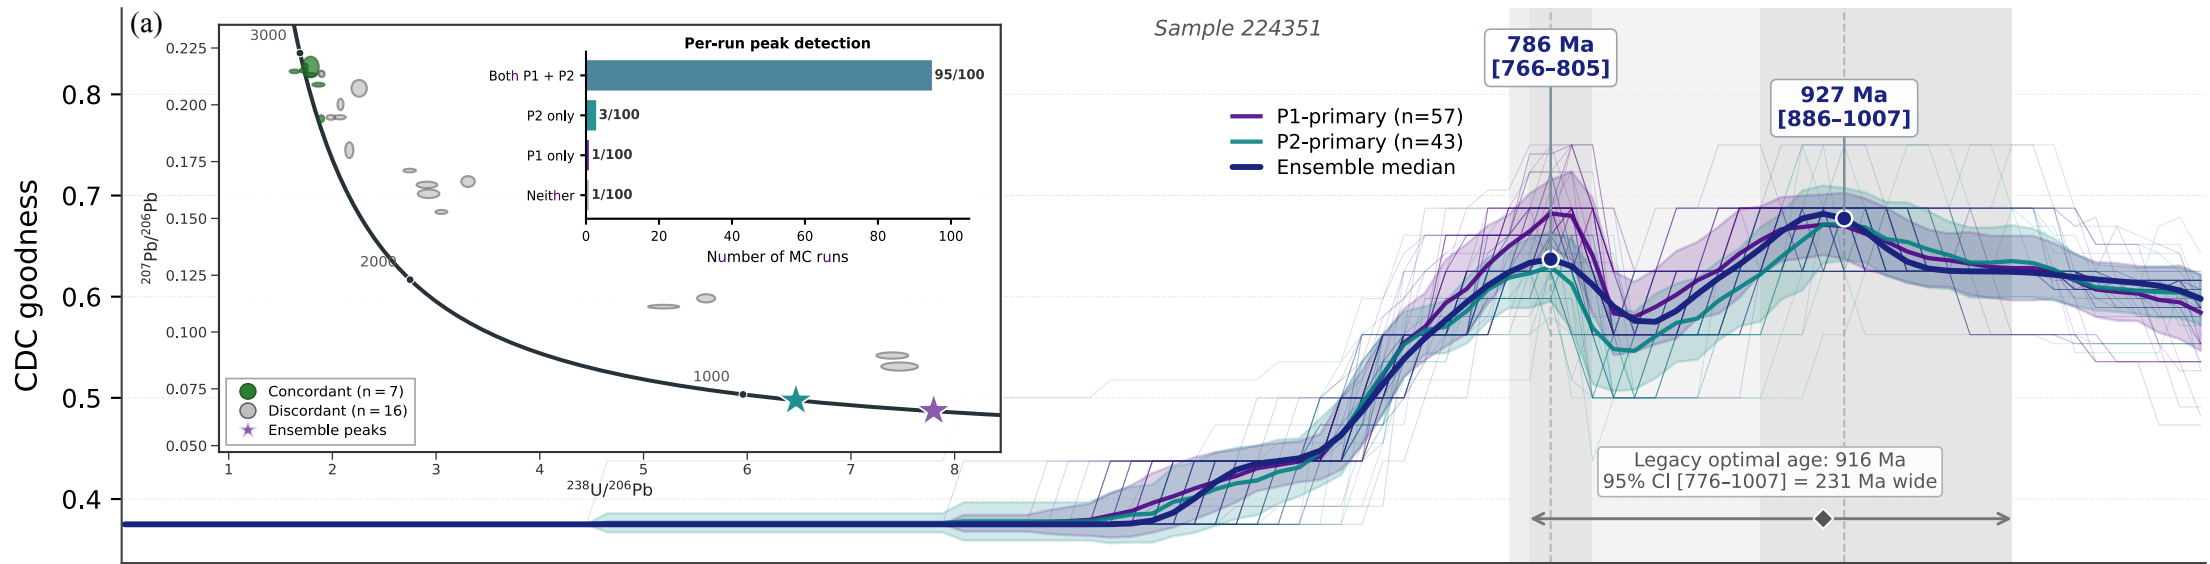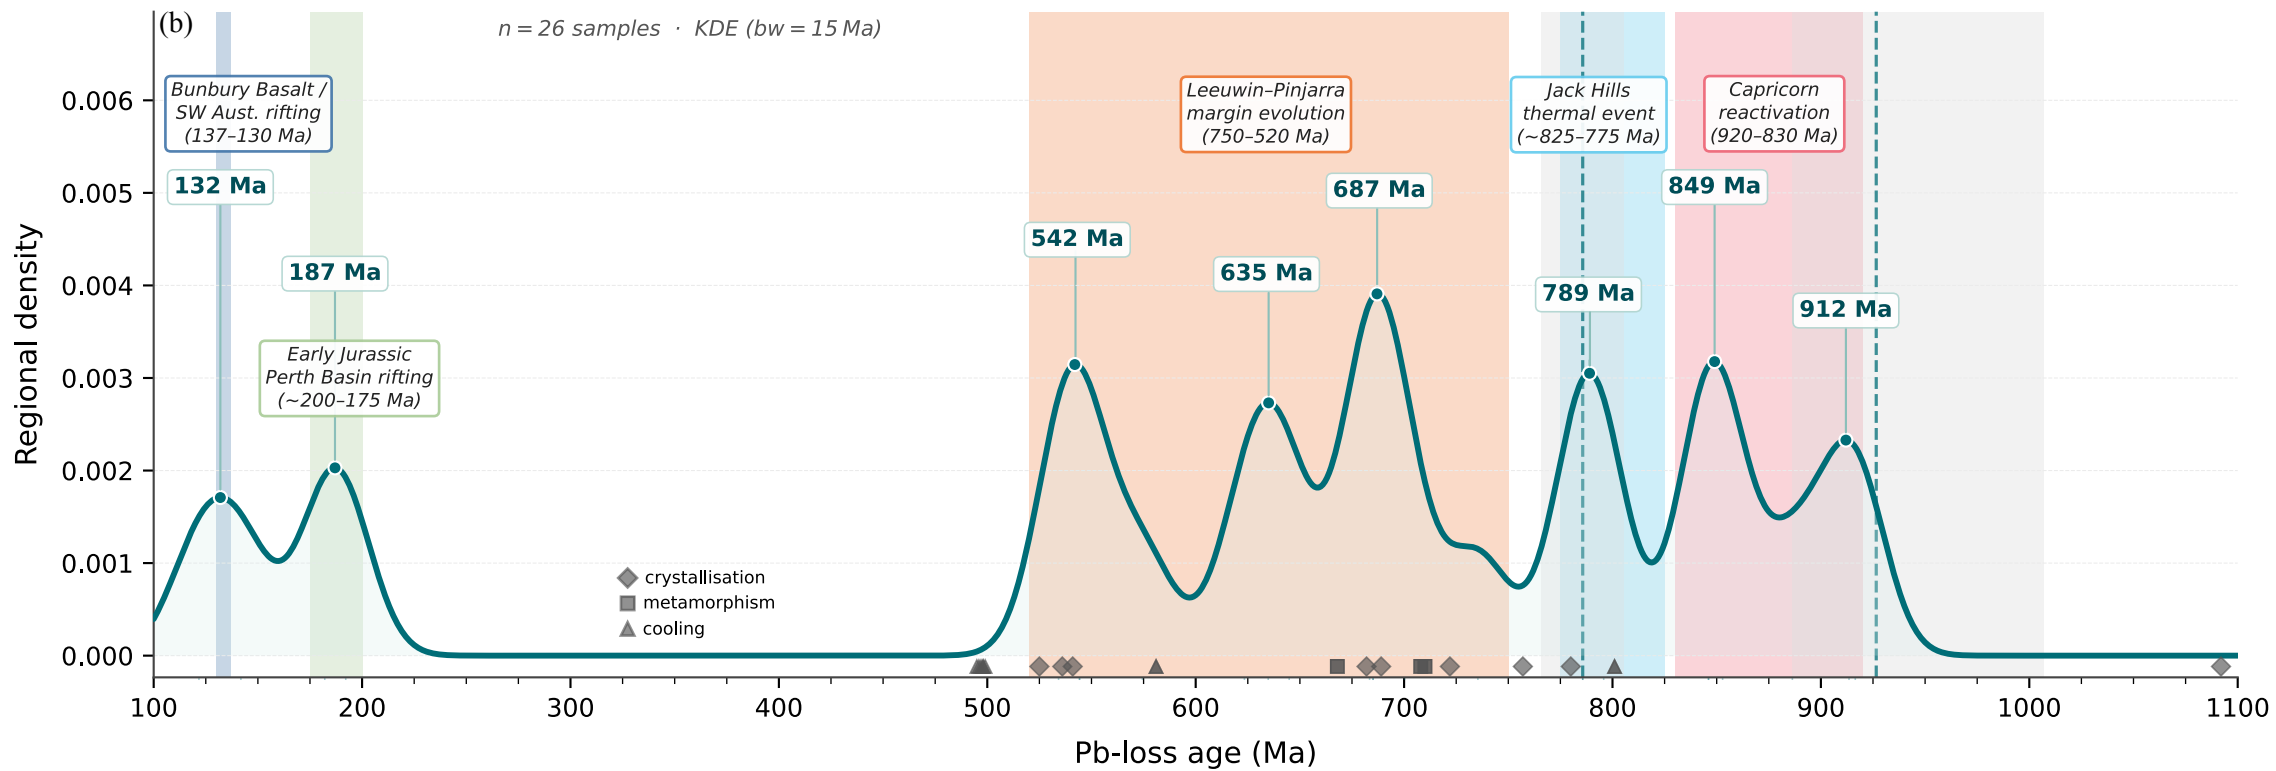

Supplement: Supplementary file [file egusphere-2026-280-AC1-supplement.pdf]
